# Supplementary material for: Comparison between Adult Patients with Sickle Cell Disease of Sub-Saharan African Origin Born in Metropolitan France and in Sub-Saharan Africa
Source: MDPI journal article supplement (doi:10.3390/jcm8122173), 2019-12-09
Supplement: s1 [file s1]

**Table S1.** Comparison of main characteristics, acute and chronic complications and therapeutic management in SS/S $\beta$ 0 patients according to the region of birth.

|                                                       | SS/S $\beta$ 0: Whole<br>Population <i>n</i> = 186 | SS/S $\beta$ 0: Patients Born in<br>France <i>n</i> = 93 | SS/S $\beta$ 0: Patients Born in Sub-<br>Saharan Africa <i>n</i> = 93 | <i>p</i> <sup>a</sup> | <i>p</i> <sup>b</sup> |
|-------------------------------------------------------|----------------------------------------------------|----------------------------------------------------------|-----------------------------------------------------------------------|-----------------------|-----------------------|
| Male, <i>n</i> (%)                                    | 91 (48.9)                                          | 50 (53.8)                                                | 41 (44.1)                                                             | 0.2                   | 0.5                   |
| Age at last follow-up (years)                         | 27.9 (22.4–34.1)                                   | 25.6 (22.2–30.2)                                         | 30 (23–36.8)                                                          | <b>0.001</b>          | <b>&lt;0.0001</b>     |
| Height (cm)                                           | 172 (165–178)                                      | 174.3 (167.8–178.6)                                      | 170 (163–177.8)                                                       | <b>0.01</b>           | <b>0.007</b>          |
| Male (cm)                                             | 177 (172–182)                                      | 176 (173.6–182)                                          | 178 (171.8–180.3)                                                     | 0.8                   | 0.4                   |
| Female (cm)                                           | 167 (161–171)                                      | 168.8 (164.3–173.8)                                      | 164 (160–169.5)                                                       | <b>0.009</b>          | <b>0.004</b>          |
| Weight (kg)                                           | 63 (57.1–70)                                       | 63.5 (59–72)                                             | 63 (56.5–70)                                                          | 0.1                   | 0.01                  |
| BMI (kg/m <sup>2</sup> )                              | 21.3 (19.8–23.8)                                   | 21.2 (19.8–24.2)                                         | 21.5 (19.9–23.7)                                                      | 0.9                   | 0.1                   |
| Hb (g/dL)                                             | 8.4 (7.5–9.4)                                      | 8.2 (7.5–9.2)                                            | 8.5 (7.9–9.6)                                                         | 0.1                   | 0.2                   |
| MCV (fL)                                              | 82 (75.3–89.8)                                     | 80 (75–89)                                               | 82.2 (76–91.4)                                                        | 0.4                   | 1                     |
| Reticulocytes (G/L)                                   | 267 (182.3–347.3)                                  | 256 (169.5–336)                                          | 275 (184.5–347.8)                                                     | 0.6                   | 0.2                   |
| LDH (UI/L)                                            | 438 (361.8–516.8)                                  | 438 (325–531.5)                                          | 438 (386.5–503)                                                       | 0.6                   | 0.2                   |
| Total bilirubin (μmol/L)                              | 42 (29–75)                                         | 39 (29–77.5)                                             | 48 (27.5–66)                                                          | 0.6                   | 0.7                   |
| HbA2 (%)                                              | 3.3 (3–3.7)                                        | 3.4 (3–3.5)                                              | 3.3 (2.9–3.7)                                                         | 1                     | 0.5                   |
| HbF (%)                                               | 5.5 (2.8–8.5)                                      | 5.1 (2–8.5)                                              | 6.7 (3.2–8.8)                                                         | 0.2                   | 0.3                   |
| <b>Vaso-occlusive crisis</b>                          |                                                    |                                                          |                                                                       |                       |                       |
| Number of admissions for VOC in the<br>last 12 months | 1 (0–2)                                            | 1 (0–3)                                                  | 1 (0–2)                                                               | 0.1                   | 0.9                   |
| Acute chest syndrome, <i>n</i> (%)                    | 145/185 (78.4)                                     | 80/93 (86)                                               | 65/92 (70.7)                                                          | <b>0.02</b>           | <b>0.005</b>          |
| Number of episodes over lifetime                      | 2 (1–4)                                            | 3 (1–4)                                                  | 1 (0–3)                                                               | <b>&lt;0.0001</b>     | <b>0.002</b>          |
| Age at first episode (years)                          | 20.9 (15.7–24.7)                                   | 19.2 (11.6–22.3)                                         | 23.5 (18.3–28.9)                                                      | <b>&lt;0.0001</b>     | <b>0.01</b>           |
| ≥1 ICU admission for ACS over lifetime                | 88/174 (50.6)                                      | 53/90 (58.9)                                             | 35/84 (41.7)                                                          | <b>0.03</b>           | <b>0.008</b>          |
| Priapism, <i>n</i> (%)                                | 31/81 (38.3)                                       | 17/45 (37.8)                                             | 14/36 (38.9)                                                          | 1                     | 0.7                   |
| Age at 1st priapism episode (years)                   | 16.8 (12.6–22.4)                                   | 18 (12.9–22.8)                                           | 15.3 (12.2–18.2)                                                      | 0.5                   | 0.7                   |
| Stroke, <i>n</i> (%)                                  | 17/177 (9.6)                                       | 6/90 (6.7)                                               | 11/87 (12.5)                                                          | 0.3                   | 0.3                   |
| Age at first stroke (years)                           | 19 (11.1–23.3)                                     | 17.1 (12.9–21.2)                                         | 19 (11–28.4)                                                          | 0.8                   | 0.1                   |
| <b>Splenic complications</b>                          |                                                    |                                                          |                                                                       |                       |                       |
| Splenectomy, <i>n</i> (%)                             | 15/175 (8.6)                                       | 8/87 (9.2)                                               | 7/88 (8)                                                              | 1                     | 0.6                   |

|                                              |                   |                     |                     |                   |             |
|----------------------------------------------|-------------------|---------------------|---------------------|-------------------|-------------|
| Age at splenectomy (years)                   | 11.3 (9–14.8)     | 12.1 (7.6–15.4)     | 10.9 (9.5–13.5)     | 0.9               | 0.2         |
| <b>Cholecystectomy, <i>n</i> (%)</b>         | 121/181 (66.9)    | 68/92 (73.9)        | 53/89 (59.6)        | 0.06              | <b>0.04</b> |
| Age at cholecystectomy (years)               | 16.8 (12.5–23.3)  | 14.4 (10.9–20.2)    | 21.1 (14.8–28.3)    | <b>&lt;0.0001</b> | 1           |
| <b>Thrombo–embolic events, <i>n</i> (%)</b>  | 14/183 (7.7)      | 8/91 (8.8)          | 6/92 (6.5)          | 0.8               | 0.2         |
| Pulmonary embolism, <i>n</i> (%)             | 11/183 (6)        | 6/91 (6.6)          | 5/92 (5.4)          | 1                 | 0.4         |
| Age at 1st thrombo–embolic event (years)     | 27.3 (24–30.3)    | 28.4 (23.2–30.6)    | 26.1 (24.6–28.3)    | 0.7               | 0.2         |
| <b>Retinopathy, <i>n</i> (%)</b>             | 72/163 (44.2)     | 39/83 (47)          | 33/80 (41.3)        | 0.6               | 0.2         |
| Age at diagnosis of retinopathy (years)      | 23.2 (20.3–29.3)  | 21.2 (16.7–25.8)    | 27.8 (23–30.9)      | <b>&lt;0.0001</b> | 0.2         |
| Laser photocoagulation, <i>n</i> (%)         | 29/146 (19.9)     | 18/76 (23.7)        | 11/70 (15.7)        | 0.3               | 0.05        |
| <b>Cardiac involvement, <i>n</i> (%)</b>     | 64/146 (43.8)     | 34/74 (46)          | 30/72 (41.7)        | 0.7               | 0.7         |
| Age at diagnosis of cardiopathy (years)      | 25.7 (20.5–29.7)  | 24.5 (20.5–28.6)    | 27.5 (21–30.6)      | 0.2               | 0.7         |
| LV systolic dysfunction, <i>n</i> (%)        | 14/181 (7.7)      | 8/91 (8.8)          | 6/90 (6.7)          | 0.8               | 0.2         |
| LV and/or LA dilatation, <i>n</i> (%)        | 53/136 (39)       | 29/72 (40.3)        | 24/64 (37.5)        | 0.9               | 0.6         |
| Age at diagnosis of LV dilatation (years)    | 25.1 (20.2–29.2)  | 24.5 (18.2–28.4)    | 27.4 (21.1–30.4)    | 0.08              | 0.5         |
| TRV ≥ 2.5 m/s, <i>n</i> (%)                  | 14/161 (8.7)      | 6/86 (7)            | 8/75 (10.7)         | 0.6               | 0.8         |
| <b>Cerebral vasculopathy, <i>n</i> (%)</b>   | 32/96 (33.3)      | 13/50 (26)          | 19/46 (41.3)        | 0.2               | 0.2         |
| Brain aneurysms, <i>n</i> (%)                | 13/92 (14.1)      | 4/50 (8)            | 9/42 (21.4)         | 0.1               | 0.09        |
| Silent cerebral infarcts, <i>n</i> (%)       | 10/79 (12.7)      | 6/43 (14)           | 4/36 (11.1)         | 0.7               | 0.4         |
| Moyamoya, <i>n</i> (%)                       | 2/91 (2.2)        | 1/53 (1.9)          | 1/38 (2.6)          | 1                 | 0.9         |
| Vessel stenosis, <i>n</i> (%)                | 7/91 (7.7)        | 2/53 (3.8)          | 5/38 (13.2)         | 0.8               | 0.7         |
| <b>Nephropathy, <i>n</i> (%)</b>             | 60/129 (46.5)     | 29/70 (41.4)        | 31/59 (52.5)        | 0.3               | 0.4         |
| eGFR (mL/mn/1.73 m <sup>2</sup> )            | 126 (112.1–136.2) | 128.2 (120.2–137.4) | 121.9 (105.2–134.6) | <b>0.009</b>      | 0.07        |
| Hyperfiltration §, <i>n</i> (%)              | 29/176 (16.5)     | 14/89 (15.7)        | 15/87 (17.2)        | 0.9               | 0.4         |
| Chronic kidney insufficiency ¶, <i>n</i> (%) | 4/174 (2.3)       | 0/89 (0)            | 4/85 (4.7)          | 0.06              | 1           |
| ACR > 3 mg/mmol, <i>n</i> (%)                | 50/114 (43.9)     | 25/62 (40.3)        | 25/52 (48.1)        | 0.5               | 0.6         |
| ACR (mg/mmol)                                | 2 (0.9–9.3)       | 1.7 (0.8–6.8)       | 2.3 (1.3–12.2)      | 0.1               | 0.4         |
| <b>Bone complications</b>                    |                   |                     |                     |                   |             |
| Avascular osteonecrosis (AON), <i>n</i> (%)  | 60/172 (34.9)     | 32/89 (36)          | 28/83 (33.7)        | 0.9               | 0.3         |
| Age at diagnosis of AON (years)              | 18.9 (16.6–26.6)  | 18.9 (16.6–25.2)    | 18.9 (16.5–28.6)    | 0.6               | 0.3         |
| H-shaped vertebrae, <i>n</i> (%)             | 39/76 (51.3)      | 18/38 (47.4)        | 21/38 (55.3)        | 0.6               | 0.5         |
| Fracture, <i>n</i> (%)                       | 48/145 (33.1)     | 29/72 (40.3)        | 19/73 (26)          | 0.1               | 0.05        |

|                                                      |                      |                       |                     |              |              |
|------------------------------------------------------|----------------------|-----------------------|---------------------|--------------|--------------|
| Osteomyelitis, <i>n</i> (%)                          | 38/169 (22.5)        | 23/80 (28.8)          | 15/89 (16.9)        | 0.1          | <b>0.04</b>  |
| Age at 1st osteomyelitis episode (years)             | 10.8 (6.4–19.2)      | 7.7 (2.8–19.2)        | 12.1 (8.9–18.8)     | 0.1          | 1            |
| <b>Skin ulcers, <i>n</i> (%)</b>                     | <b>22/151 (14.6)</b> | <b>6/80 (7.5)</b>     | <b>16/71 (22.5)</b> | <b>0.01</b>  | <b>0.04</b>  |
| Age at first episode (years)                         | 18.6 (16.8–27.5)     | 23.2 (18.6–29.6)      | 18.5 (14.4–25.8)    | 0.2          | <b>0.005</b> |
| <b>Hydroxyurea</b>                                   |                      |                       |                     |              |              |
| Lifetime exposure, <i>n</i> (%)                      | 131/186 (70.4)       | 69/93 (74.2)          | 62/93 (66.7)        | 0.3          | 0.2          |
| Current treatment, <i>n</i> (%)                      | 105/186 (56.5)       | 54/93 (58.1)          | 51/93 (54.8)        | 0.8          | 0.7          |
| Age at introduction (years)                          | 19.4 (15.4–24.8)     | 18.5 (14.3–23.2)      | 22.1 (16.4–28.5)    | <b>0.003</b> | <b>0.002</b> |
| Cumulative lifetime dose (g)                         | 1396 (502.5–2470.8)  | 1299.3 (540.3–2748.2) | 1424.5 (456–1963)   | 0.7          | 0.2          |
| Cumulative lifetime duration (years)                 | 4 (1.6–8.1)          | 3.9 (1.9–8)           | 4.2 (1.4–7.9)       | 0.8          | <b>0.003</b> |
| <b>Chronic blood transfusion program</b>             |                      |                       |                     |              |              |
| Previous, <i>n</i> (%)                               | 60/177 (33.9)        | 28/89 (31.5)          | 32/88 (36.4)        | 0.6          | 0.9          |
| Current, <i>n</i> (%)                                | 28/180 (15.6)        | 17/93 (18.3)          | 11/87 (12.6)        | 0.4          | 0.2          |
| <b>Blood transfusion complications, <i>n</i> (%)</b> | <b>41/154 (26.6)</b> | <b>22/80 (27.5)</b>   | <b>19/74 (25.7)</b> | <b>0.9</b>   | <b>0.6</b>   |
| Types of transfusion complications *:                |                      |                       |                     |              |              |
| Antibodies without hemolytic reaction, <i>n</i> (%)  | 31/40 (77.5)         | 17/22 (77.3)          | 14/18 (77.8)        | 1            | 0.7          |
| DHTR with antibodies, <i>n</i> (%)                   | 6/40 (15)            | 4/22 (18.2)           | 2/18 (11.1)         | 0.7          | 0.7          |
| DHTR without antibodies, <i>n</i> (%)                | 2/40 (5)             | 1/22 (4.6)            | 1/18 (5.6)          | 1            | 0.5          |
| Acute hemolytic transfusion reaction, <i>n</i> (%)   | 1/40 (2.5)           | 0/22 (0)              | 1/18 (5.6)          | 0.5          | 1            |

SCD: sickle cell disease, BMI: body mass index, Hb: hemoglobin, MCV: mean corpuscular volume, LDH: lactate dehydrogenase, HbA2: adult hemoglobin A2, HbF: fetal hemoglobin. VOC = vaso-occlusive crisis, ACS = acute chest syndrome, LV: left ventricle, LA: left atrial, TRV: tricuspid regurgitation velocity, ACR: urine albumin-to-creatinine ratio, AON: avascular osteonecrosis, eGFR: estimated glomerular filtration rate. § Renal hyperfiltration was defined as an eGFR  $\geq 130$  mL/min/1.73m<sup>2</sup> for women and  $\geq 140$  mL/min/1.73 m<sup>2</sup> for men. ¶ Chronic kidney insufficiency was defined by an eGFR  $< 60$  mL/min/1.73 m<sup>2</sup>. DHTR: delayed hemolytic transfusion reactions, MRI: magnetic resonance imaging. Continuous variables are expressed as the median [IQR]. <sup>a</sup> bivariate analysis: Chi<sup>2</sup>, Fisher's, Student's or Wilcoxon test. <sup>b</sup> multivariate analysis with adjustment for age, gender and genotype. Significant p values appear in bold.
